# Supplementary material
Source: PubMed Central journal article supplement (PMC7820920)
Supplement: mmc4.pdf [file mmc4.pdf]

# GeneMANIA report

Created on : 26 May 2020 19:52:10

Last database update : 13 March 2017 00:00:00

Application version : 3.6.0

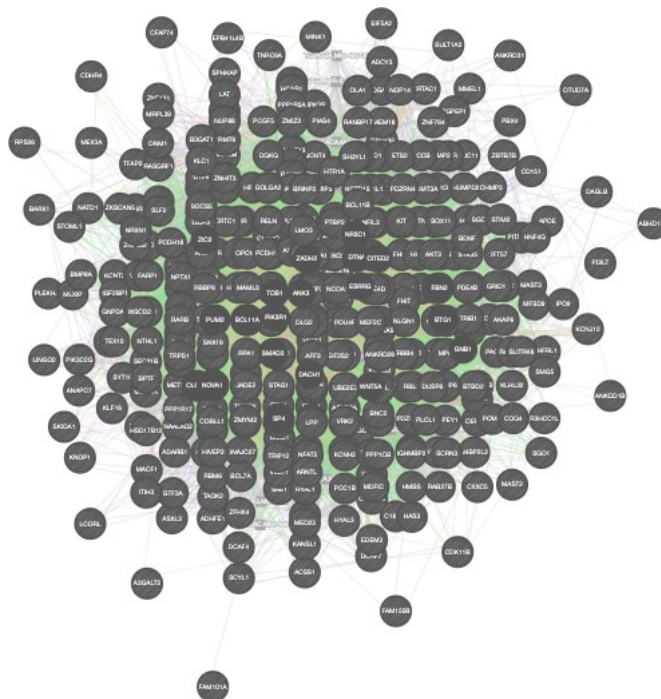

## Networks

- miRNA-target-predictions-2013
- Transcriptional-factor-targets-2013
- Co-expression
- Physical Interactions
- Genetic Interactions
- Predicted
- Co-localization
- Pathway
- Shared protein domains

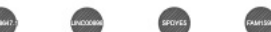

## Functions

N/A

# Search parameters

**Organism** Homo sapiens (human)

**Genes** ENSG00000002822 , ENSG00000004534 , ENSG00000005381 , ENSG00000007923 ,  
ENSG00000008118 , ENSG00000008196 , ENSG00000008197 , ENSG00000010818 ,  
ENSG00000021645 , ENSG00000021826 , ENSG00000028116 , ENSG00000035115 ,  
ENSG00000037749 , ENSG00000041353 , ENSG00000043143 , ENSG00000048540 ,  
ENSG00000053900 , ENSG00000054282 , ENSG00000055118 , ENSG00000058335 ,  
ENSG00000058866 , ENSG00000060237 , ENSG00000065057 , ENSG00000066382 ,  
ENSG00000067221 , ENSG00000070366 , ENSG00000071537 , ENSG00000072609 ,  
ENSG00000072864 , ENSG00000075035 , ENSG00000075826 , ENSG00000077092 ,  
ENSG00000077616 , ENSG00000078114 , ENSG00000078142 , ENSG00000081189 ,  
ENSG00000082438 , ENSG00000083097 , ENSG00000084676 , ENSG00000086015 ,  
ENSG00000087269 , ENSG00000087274 , ENSG00000090905 , ENSG00000090975 ,  
ENSG00000091656 , ENSG00000095203 , ENSG00000095713 , ENSG00000099250 ,  
ENSG00000099308 , ENSG00000100784 , ENSG00000101191 , ENSG00000101574 ,  
ENSG00000101639 , ENSG00000102837 , ENSG00000102908 , ENSG00000103044 ,  
ENSG00000103051 , ENSG00000103126 , ENSG00000103479 , ENSG00000103550 ,  
ENSG00000104112 , ENSG00000104447 , ENSG00000104886 , ENSG00000105173 ,  
ENSG00000105229 , ENSG00000105662 , ENSG00000105717 , ENSG00000106341 ,  
ENSG00000106536 , ENSG00000106976 , ENSG00000108559 , ENSG00000109689 ,  
ENSG00000109906 , ENSG00000109956 , ENSG00000110092 , ENSG00000110987 ,  
ENSG00000111885 , ENSG00000112282 , ENSG00000113100 , ENSG00000113448 ,  
ENSG00000114054 , ENSG00000114378 , ENSG00000114446 , ENSG00000114455 ,  
ENSG00000114480 , ENSG00000114812 , ENSG00000115137 , ENSG00000115138 ,  
ENSG00000115310 , ENSG00000115392 , ENSG00000115561 , ENSG00000115641 ,  
ENSG00000115896 , ENSG00000116117 , ENSG00000116406 , ENSG00000116783 ,  
ENSG00000117020 , ENSG00000117569 , ENSG00000118007 , ENSG00000118689 ,  
ENSG00000118946 , ENSG00000119599 , ENSG00000119772 , ENSG00000119906 ,  
ENSG00000120071 , ENSG00000120341 , ENSG00000120451 , ENSG00000121741 ,  
ENSG00000121904 , ENSG00000121989 , ENSG00000122034 , ENSG00000122257 ,  
ENSG00000122515 , ENSG00000122965 , ENSG00000125834 , ENSG00000125845 ,  
ENSG00000125977 , ENSG00000126214 , ENSG00000127152 , ENSG00000127603 ,  
ENSG00000129810 , ENSG00000129911 , ENSG00000130203 , ENSG00000130222 ,  
ENSG00000130517 , ENSG00000131323 , ENSG00000131668 , ENSG00000132383 ,  
ENSG00000132740 , ENSG00000132849 , ENSG00000133243 , ENSG00000133794 ,  
ENSG00000133958 , ENSG00000134443 , ENSG00000134489 , ENSG00000135272 ,  
ENSG00000135953 , ENSG00000135972 , ENSG00000136379 , ENSG00000136451 ,  
ENSG00000136485 , ENSG00000136531 , ENSG00000136573 , ENSG00000136891 ,  
ENSG00000136944 , ENSG00000137764 , ENSG00000138031 , ENSG00000138050 ,  
ENSG00000138430 , ENSG00000138821 , ENSG00000139144 , ENSG00000139318 ,  
ENSG00000139323 , ENSG00000139915 , ENSG00000139973 , ENSG00000140464 ,  
ENSG00000140563 , ENSG00000140718 , ENSG00000140836 , ENSG00000140945 ,

ENSG00000141076 , ENSG00000141293 , ENSG00000141431 , ENSG00000141452 ,  
ENSG00000141503 , ENSG00000141564 , ENSG00000141682 , ENSG00000142186 ,  
ENSG00000142230 , ENSG00000142606 , ENSG00000142609 , ENSG00000143971 ,  
ENSG00000144218 , ENSG00000144278 , ENSG00000144306 , ENSG00000145012 ,  
ENSG00000145147 , ENSG00000145194 , ENSG00000145241 , ENSG00000145642 ,  
ENSG00000145687 , ENSG00000145700 , ENSG00000145743 , ENSG00000145919 ,  
ENSG00000146263 , ENSG00000147576 , ENSG00000148143 , ENSG00000149084 ,  
ENSG00000149187 , ENSG00000149930 , ENSG00000150672 , ENSG00000150938 ,  
ENSG00000151067 , ENSG00000151136 , ENSG00000151320 , ENSG00000151353 ,  
ENSG00000151466 , ENSG00000152061 , ENSG00000152192 , ENSG00000152214 ,  
ENSG00000152767 , ENSG00000153064 , ENSG00000153113 , ENSG00000153495 ,  
ENSG00000153707 , ENSG00000153820 , ENSG00000153827 , ENSG00000153885 ,  
ENSG00000153944 , ENSG00000154027 , ENSG00000154127 , ENSG00000154415 ,  
ENSG00000154478 , ENSG00000154719 , ENSG00000154930 , ENSG00000155093 ,  
ENSG00000155511 , ENSG00000156564 , ENSG00000156687 , ENSG00000157404 ,  
ENSG00000157557 , ENSG00000158517 , ENSG00000159217 , ENSG00000159322 ,  
ENSG00000159788 , ENSG00000160685 , ENSG00000162104 , ENSG00000162267 ,  
ENSG00000162366 , ENSG00000162613 , ENSG00000162614 , ENSG00000162670 ,  
ENSG00000162687 , ENSG00000163281 , ENSG00000163297 , ENSG00000163577 ,  
ENSG00000163618 , ENSG00000163659 , ENSG00000163872 , ENSG00000164077 ,  
ENSG00000164161 , ENSG00000164535 , ENSG00000164749 , ENSG00000164985 ,  
ENSG00000164989 , ENSG00000165030 , ENSG00000165626 , ENSG00000165966 ,  
ENSG00000166024 , ENSG00000166436 , ENSG00000166603 , ENSG00000167110 ,  
ENSG00000168944 , ENSG00000168952 , ENSG00000169255 , ENSG00000169340 ,  
ENSG00000169519 , ENSG00000169554 , ENSG00000169760 , ENSG00000169783 ,  
ENSG00000169918 , ENSG00000169951 , ENSG00000170035 , ENSG00000170092 ,  
ENSG00000170500 , ENSG00000170549 , ENSG00000170927 , ENSG00000171150 ,  
ENSG00000171246 , ENSG00000171303 , ENSG00000171385 , ENSG00000171604 ,  
ENSG00000171634 , ENSG00000171681 , ENSG00000171791 , ENSG00000172260 ,  
ENSG00000172262 , ENSG00000172638 , ENSG00000172733 , ENSG00000172995 ,  
ENSG00000173068 , ENSG00000173334 , ENSG00000173473 , ENSG00000173482 ,  
ENSG00000174482 , ENSG00000174672 , ENSG00000174891 , ENSG00000174953 ,  
ENSG00000175029 , ENSG00000175115 , ENSG00000175161 , ENSG00000175471 ,  
ENSG00000175727 , ENSG00000175764 , ENSG00000175806 , ENSG00000176165 ,  
ENSG00000176697 , ENSG00000176887 , ENSG00000176928 , ENSG00000177311 ,  
ENSG00000177697 , ENSG00000178177 , ENSG00000178394 , ENSG00000178568 ,  
ENSG00000178700 , ENSG00000178882 , ENSG00000179088 , ENSG00000179097 ,  
ENSG00000179348 , ENSG00000179915 , ENSG00000180269 , ENSG00000180592 ,  
ENSG00000180628 , ENSG00000182463 , ENSG00000182674 , ENSG00000182771 ,  
ENSG00000182985 , ENSG00000183682 , ENSG00000183715 , ENSG00000183856 ,  
ENSG00000184185 , ENSG00000184389 , ENSG00000184564 , ENSG00000184588 ,  
ENSG00000185046 , ENSG00000185053 , ENSG00000185345 , ENSG00000185352 ,  
ENSG00000185559 , ENSG00000185924 , ENSG00000186094 , ENSG00000186231 ,  
ENSG00000186792 , ENSG00000187164 , ENSG00000187391 , ENSG00000187492 ,

ENSG00000188385 , ENSG00000188641 , ENSG00000189045 , ENSG00000189056 ,  
ENSG00000189184 , ENSG00000189283 , ENSG00000189292 , ENSG00000189403 ,  
ENSG00000196353 , ENSG00000196510 , ENSG00000196652 , ENSG00000196782 ,  
ENSG00000196917 , ENSG00000197165 , ENSG00000197275 , ENSG00000197381 ,  
ENSG00000197586 , ENSG00000197728 , ENSG00000198597 , ENSG00000198700 ,  
ENSG00000198890 , ENSG00000198894 , ENSG00000198919 , ENSG00000198952 ,  
ENSG00000204764 , ENSG00000205213 , ENSG00000205678 , ENSG00000206538 ,  
ENSG00000206560 , ENSG00000213639 , ENSG00000213658 , ENSG00000214194 ,  
ENSG00000226490 , ENSG00000243566 , ENSG00000244754 , ENSG00000248333 ,  
ENSG00000254726 , ENSG00000256269 , ENSG00000273611 , ENSG00000274180

**Network weighting** Automatically selected weighting method

**Networks** **A**

---

Abu-Odeh-Aqeilan-2014 , Agrawal-Sedivy-2010 , Aichem-Groettrup-2012 , Albers-Koegl-2005 , Alexandru-Deshaies-2008 , Alizadeh-Staudt-2000 , Andresen-Flores-Morales-2014 , Arbuckle-Grant-2010 , Arroyo-Aloy-2014 , Arroyo-Aloy-2015

**B**

---

Bahr-Bowler-2013 , Bailey-Hieter-2015 , Bandyopadhyay-Ideker-2010 , Bantscheff-Drewes-2011 , Barr-Knapp-2009 , Barrios-Rodiles-Wrana-2005 , Behrends-Harper-2010 , Behzadnia-Lührmann-2007 , Bennett-Harper-2010 , Benzinger-Hermeking-2005 , Berggård-James-2006 , Bett-Hay-2013 , Bhatnagar-Attie-2014 , Bild-Nevins-2006 B , BIOGRID-SMALL-SCALE-STUDIES , BIOGRID-SMALL-SCALE-STUDIES , Blandin-Richard-2013 , Blomen-Brummelkamp-2015 , Blomen-Brummelkamp-2015 , Bogachek-Weigel-2014 , Boldrick-Relman-2002 , Bonacci-Soubeyran-2014 , Bouwmeester-Supert-Furga-2004 , Brajenovic-Drewes-2004 , Brehme-Supert-Furga-2009 , Bruderer-Hay-2011 , Burington-Shaughnessy-2008 , Butland-Hayden-2014 , Byron-Humphries-2012

**C**

---

Cai-Conaway-2007 , Camargo-Brandon-2007 , Campos-Reinberg-2015 , Cao-Chinnaiyan-2014 , Carmon-Liu-2014 , CELL\_MAP , Chen-Brown-2002 , Chen-Ge-2013 , Chen-Huang-2014 , Chen-Zhang-2013 , Christianson-Kopito-2011 , Cloutier-Coulombe-2013 , Colland-Gauthier-2004 , Consolidated-Pathways-2013 , Corominas-Iakoucheva-2014 , Couzens-Gingras-2013 , Cox-Rizzino-2013 , Coyaud-Raught-2015

**D**

---

Danielsen-Nielsen-2011 , Dart-Wells-2015 , de Hoog-Mann-2004 , Diner-Cristea-2015 , Dobbin-Giordano-2005 , Drissi-Boisvert-2015 , Drug-interactions-2013 , Dyer-Sobral-2010

**E**

---

Emanuele-Elledge-2011 , Emdal-Olsen-2015 , Ewing-Figeys-2007

**F**

---

## **F**

---

Fenner-Prehn-2010 , Floyd-Pagliarini-2016 , Foerster-Ritter-2013 , Fogeron-Lange-2013 , Foster-Marshall-2013 , Freibaum-Taylor-2010

## **G**

---

Gabriel-Baumgrass-2016 , Galligan-Howley-2015 , Gao-Reinberg-2012 , Gautier-Hall-2009 , Giannone-Liu-2010 , Glatter-Gstaiger-2009 , Gloeckner-Ueffing-2007 , Goehler-Wanker-2004 , Golebiowski-Hay-2009 , Goudreault-Gingras-2009 , Grant-2010 , Greco-Cristea-2011 , Grossmann-Stelzl-2015 , Guarani-Harper-2014 , Gupta-Pelletier-2015

## **H**

---

Hanson-Clayton-2014 , Hauri-Gstaiger-2013 , Havrylov-Redowicz-2009 , Havugimana-Emili-2012 , Hayes-Urbé-2012 , Hegele-Stelzl-2012 A , Hegele-Stelzl-2012 B , Hein-Mann-2015 , Hill-Livingston-2014 , HUMANCYC , Humphries-Humphries-2009 , Hutchins-Peters-2010 , Huttlin-Gygi-2015

## **I**

---

I2D-BIND-Fly2Human , I2D-BIND-Mouse2Human , I2D-BIND-Rat2Human , I2D-BIND-Worm2Human , I2D-BIND-Yeast2Human , I2D-BioGRID-Fly2Human , I2D-BioGRID-Mouse2Human , I2D-BioGRID-Rat2Human , I2D-BioGRID-Worm2Human , I2D-BioGRID-Yeast2Human , I2D-Chen-Pawson-2009-PiwiScreen-Mouse2Human , I2D-Formstecher-Daviet-2005-Embryo-Fly2Human , I2D-Giot-Rothbert-2003-Low-Fly2Human , I2D-INNATEDB-Mouse2Human , I2D-IntAct-Fly2Human , I2D-IntAct-Mouse2Human , I2D-IntAct-Rat2Human , I2D-IntAct-Worm2Human , I2D-IntAct-Yeast2Human , I2D-Krogan-Greenblatt-2006-Core-Yeast2Human , I2D-Krogan-Greenblatt-2006-NonCore-Yeast2Human , I2D-Li-Vidal-2004-CORE-1-Worm2Human , I2D-Li-Vidal-2004-non-core-Worm2Human , I2D-Manual-Mouse2Human , I2D-Manual-Rat2Human , I2D-MGI-Mouse2Human , I2D-MINT-Fly2Human , I2D-MINT-Mouse2Human , I2D-MINT-Rat2Human , I2D-MINT-Worm2Human , I2D-MINT-Yeast2Human , I2D-Ptacek-Snyder-2005-Yeast2Human , I2D-Tarassov-PCA-Yeast2Human , I2D-Tewari-Vidal-2004-TGFb-Worm2Human , I2D-vonMering-Bork-2002-High-Yeast2Human , I2D-vonMering-Bork-2002-Low-Yeast2Human , I2D-vonMering-Bork-2002-Medium-Yeast2Human , I2D-Wang-Orkin-2006-ESmplx-Mouse2Human , I2D-Wang-Orkin-2006-ESmplxlow-Mouse2Human , I2D-Yu-Vidal-2008-GoldStd-Yeast2Human , IMID , Ingham-Pawson-2005 , Innocenti-Brown-2011 , INTERPRO , InterPro , IREF-BIND , IREF-BIOGRID , IREF-DIP , IREF-HPRD , IREF-INTACT , IREF-MATRIXDB , IREF-MPPI , IREF-PUBMED , IREF-SMALL-SCALE-STUDIES , IREF-SMALL-SCALE-STUDIES

## **J**

---

Jeronimo-Coulombe-2007 , Jin-Pawson-2004 , Johnson-Kerner-Wichterle-2015 , Johnson-Shoemaker-2003 , Jones-MacBeath-2006 , Joshi-Cristea-2013 , Jäger-Krogan-2011

## **K**

---

Kahle-Zoghbi-2011 , Kaltenbach-Hughes-2007 , Katsogiannou-Rocchi-2014 , Kim-Gygi-2011 , Kim-Major-2015 , Kneissl-Grummt-2003 , Koch-Hermeking-2007 , Kotlyar-Juristica-2015 , Kristensen-Foster-2012 , Kärblane-Sarmiento-2015 , Kirli-Görlich-2015

## **L**

---

Lambert-Gingras-2015 , Lamoliatte-Thibault-2014 , Lau-Ronai-2012 , Lee-Songyang-2011 , Lehner-Sanderson-2004 A , Lehner-Sanderson-2004 B , Leng-Wang-2014 , Leung-Jones-2014 , Li-Chen-2015 , Li-Dorf-2011 A , Li-Dorf-2011 B , Li-Dorf-2014 , Li-Haura-2013 , Lim-Zoghbi-2006 , Lin-Smith-2010 , Lipp-Guthrie-2015 , Liu-Wang-2012 , Llères-Lamond-2010 , Loch-Strickler-2012 , Low-Heck-2014 , Lu-Zhang-2013 , Luo-Elledge-2009

## **M**

---

Mak-Moffat-2010 , Mallon-McKay-2013 , Malovannaya-Qin-2010 , Markson-Sanderson-2009 , Maréchal-Zou-2014 , Matsumoto-Nakayama-2005 , McCracken-Blencowe-2005 , McFarland-Nussbaum-2008 , Meek-Piwnica-Worms-2004 , Milev-Mouland-2012 , miRNA-target-predictions-2013 , Miyamoto-Sato-Yanagawa-2010 , Murakawa-Landthaler-2015

## **N**

---

Nakayama-Ohara-2002 , Nakayasu-Adkins-2013 , Napolitano-Meroni-2011 , Narayan-Bennett-2012 , Nathan-Goldberg-2013 , NCI\_NATURE , Neganova-Lako-2011 , Newman-Keating-2003 , Nicholson-Hupp-2014 , Noble-Diehl-2008

## **O**

---

Oliviero-Cagney-2015 , Olma-Pintard-2009 , Oláh-Ovádi-2011 , Oshikawa-Nakayama-2012 , Ouyang-Gill-2009

## **P**

---

Panigrahi-Pati-2012 , Papp-Lamia-2015 , Perez-Hernandez-Yáñez-Mó-2013 , Perou-Botstein-1999 , Perou-Botstein-2000 , Persaud-Rotin-2009 , Petschnigg-Stagljar-2014 , PFAM , Phillips-Corn-2013 , Pichlmair-Supertti-Furga-2011 , Pichlmair-Supertti-Furga-2012 , Pilot-Storck-Goillot-2010 , Povlsen-Choudhary-2012

## **R**

---

Ramachandran-LaBaer-2004 , Raman-Harper-2015 , Ramaswamy-Golub-2001 , Ravasi-Hayashizaki-2010 , REACTOME , Reinke-Keating-2013 , Reyniers-Taymans-2014 , Richter-Chrzanowska-Lightowlers-2010 , Rieger-Chu-2004 , Rolland-Vidal-2014 , Rosenwald-Staudt-2001 , Roth-Zlotnik-2006 , Roux-Burke-2012 , Rowbotham-Mermoud-2011 , Roy-Pardo-2014 , Roy-Parent-2013 , Rual-Vidal-2005 A , Rual-Vidal-2005 B

## **S**

---

Sang-Jackson-2011 , Sato-Conaway-2004 , Schadt-Shoemaker-2004 , Scholz-Taylor-

## **S**

---

2016 , Singh-Moore-2012 , Smirnov-Cheung-2009 , So-Colwill-2015 , Soler-López-Aloy-2011 , Sowa-Harper-2009 , Stehling-Lill-2012 , Stehling-Lill-2013 , Stelzl-Wanker-2005 , Stes-Gevaert-2014 , Stuart-Kim-2003 , Suter-Wanker-2013

## **T**

---

Taipale-Lindquist-2012 , Taipale-Lindquist-2014 , Takahashi-Conaway-2011 , Tarallo-Weisz-2011 , Tatham-Hay-2011 , Teixeira-Gomes-2010 , Thalappilly-Duseti-2008 , Thompson-Luchansky-2014 , Tong-Moran-2014 , Toyoshima-Grandori-2012 , Transcriptional-factor-targets-2013 , Tsai-Cristea-2012

## **U**

---

Udeshi-Carr-2012

## **V**

---

van Wijk-Timmers-2009 , Vandamme-Angrand-2011 , Varjosalo-Gstaiger-2013 , Varjosalo-Supert-Furga-2013 , Venkatesan-Vidal-2009 , Vermeulen-Mann-2010 , Vinayagam-Wanker-2011 , Virok-Fülöp-2011 , Vizeacoumar-Moffat-2013

## **W**

---

Wagner-Choudhary-2011 , Wallach-Kramer-2013 , Wan-Emili-2015 , Wang-Balch-2006 , Wang-Cheung-2015 , Wang-He-2008 , Wang-Maris-2006 , Wang-Xu-2015 , Wang-Yang-2011 , Weimann-Stelzl-2013 A , Weimann-Stelzl-2013 B , Weinmann-Meister-2009 , Wen-Wu-2014 , Whisenant-Salomon-2015 , Wilker-Yaffe-2007 , Willingham-Muchowski-2003 , Witt-Labeit-2008 , Wong-O'Bryan-2012 , Woods-Monteiro-2012 , Woodsmith-Sanderson-2012 , Wu-Garvey-2007 , Wu-Li-2007 , Wu-Ma-2012 , Wu-Stein-2010 , Wu-Stein-2010

## **X**

---

Xiao-Lefkowitz-2007 , Xie-Cong-2013 , Xie-Green-2012 , Xu-Ye-2012

## **Y**

---

Yang-Chen-2010 , Yatim-Benkirane-2012 , Yu-Chow-2013 , Yu-Vidal-2011

## **Z**

---

Zanon-Pichler-2013 , Zhang-Shang-2006 , Zhang-Zou-2011 , Zhao-Krug-2005 , Zhao-Yang-2011 , Zhou-Conrads-2004 , Zhou-Hanemann-2016

# Genes

| <b>Gene</b> | <b>Description</b>                                                                     | <b>Rank</b> |
|-------------|----------------------------------------------------------------------------------------|-------------|
| AC138647.1  |                                                                                        | N/A         |
| LINC00998   | long intergenic non-protein coding RNA 998 [Source:HGNC Symbol;Acc:HGNC:48953]         | N/A         |
| ANKDD1B     | ankyrin repeat and death domain containing 1B [Source:HGNC Symbol;Acc:HGNC:32525]      | N/A         |
| FAM159B     | family with sequence similarity 159 member B [Source:HGNC Symbol;Acc:HGNC:34236]       | N/A         |
| SPDYE5      | speedy/RINGO cell cycle regulator family member E5 [Source:HGNC Symbol;Acc:HGNC:35464] | N/A         |
| A3GALT2     | alpha 1,3-galactosyltransferase 2 [Source:HGNC Symbol;Acc:HGNC:30005]                  | N/A         |
| FAM101A     | family with sequence similarity 101 member A [Source:HGNC Symbol;Acc:HGNC:27051]       | N/A         |
| CDHR4       | cadherin related family member 4 [Source:HGNC Symbol;Acc:HGNC:34527]                   | N/A         |
| LINGO2      | leucine rich repeat and Ig domain containing 2 [Source:HGNC Symbol;Acc:HGNC:21207]     | N/A         |
| SKIDA1      | SKI/DACH domain containing 1 [Source:HGNC Symbol;Acc:HGNC:32697]                       | N/A         |
| ANKRD31     | ankyrin repeat domain 31 [Source:HGNC Symbol;Acc:HGNC:26853]                           | N/A         |
| FAM150B     | family with sequence similarity 150 member B [Source:HGNC Symbol;Acc:HGNC:27683]       | N/A         |
| PDILT       | protein disulfide isomerase like, testis expressed [Source:HGNC Symbol;Acc:HGNC:27338] | N/A         |
| MEX3A       | mex-3 RNA binding family member A [Source:HGNC Symbol;Acc:HGNC:33482]                  | N/A         |
| SPHKAP      | SPHK1 interactor, AKAP domain containing [Source:HGNC Symbol;Acc:HGNC:30619]           | N/A         |
| MMEL1       | membrane metallo-endopeptidase-like 1 [Source:HGNC Symbol;Acc:HGNC:14668]              | N/A         |
| ABHD17C     | abhydrolase domain containing 17C [Source:HGNC Symbol;Acc:HGNC:26925]                  | N/A         |
| LCORL       | ligand dependent nuclear receptor corepressor like [Source:HGNC Symbol;Acc:HGNC:30776] | N/A         |



| <b>Gene</b> | <b>Description</b>                                                                              | <b>Rank</b> |
|-------------|-------------------------------------------------------------------------------------------------|-------------|
| OTUD7A      | OTU deubiquitinase 7A [Source:HGNC Symbol;Acc:HGNC:20718]                                       | N/A         |
| CDK11B      | cyclin dependent kinase 11B [Source:HGNC Symbol;Acc:HGNC:1729]                                  | N/A         |
| CFAP74      | cilia and flagella associated protein 74 [Source:HGNC Symbol;Acc:HGNC:29368]                    | N/A         |
| DAGLB       | diacylglycerol lipase beta [Source:HGNC Symbol;Acc:HGNC:28923]                                  | N/A         |
| EPB41L4B    | erythrocyte membrane protein band 4.1 like 4B [Source:HGNC Symbol;Acc:HGNC:19818]               | N/A         |
| KCNJ12      | potassium voltage-gated channel subfamily J member 12 [Source:HGNC Symbol;Acc:HGNC:6258]        | N/A         |
| ZBTB38      | zinc finger and BTB domain containing 38 [Source:HGNC Symbol;Acc:HGNC:26636]                    | N/A         |
| KNOP1       | lysine rich nucleolar protein 1 [Source:HGNC Symbol;Acc:HGNC:34404]                             | N/A         |
| BARX1       | BARX homeobox 1 [Source:HGNC Symbol;Acc:HGNC:955]                                               | N/A         |
| ZNF131      | zinc finger protein 131 [Source:HGNC Symbol;Acc:HGNC:12915]                                     | N/A         |
| GPR139      | G protein-coupled receptor 139 [Source:HGNC Symbol;Acc:HGNC:19995]                              | N/A         |
| SULT1A2     | sulfotransferase family 1A member 2 [Source:HGNC Symbol;Acc:HGNC:11454]                         | N/A         |
| ASXL3       | additional sex combs like 3, transcriptional regulator [Source:HGNC Symbol;Acc:HGNC:29357]      | N/A         |
| ANAPC7      | anaphase promoting complex subunit 7 [Source:HGNC Symbol;Acc:HGNC:17380]                        | N/A         |
| KCNT2       | potassium sodium-activated channel subfamily T member 2 [Source:HGNC Symbol;Acc:HGNC:18866]     | N/A         |
| PBX4        | PBX homeobox 4 [Source:HGNC Symbol;Acc:HGNC:13403]                                              | N/A         |
| RPS26       | ribosomal protein S26 [Source:HGNC Symbol;Acc:HGNC:10414]                                       | N/A         |
| KLF16       | Kruppel like factor 16 [Source:HGNC Symbol;Acc:HGNC:16857]                                      | N/A         |
| PLEKHJ1     | pleckstrin homology domain containing J1 [Source:HGNC Symbol;Acc:HGNC:18211]                    | N/A         |
| C12orf42    | chromosome 12 open reading frame 42 [Source:HGNC Symbol;Acc:HGNC:24729]                         | N/A         |
| ADHFE1      | alcohol dehydrogenase, iron containing 1 [Source:HGNC Symbol;Acc:HGNC:16354]                    | N/A         |
| MDGA2       | MAM domain containing glycosylphosphatidylinositol anchor 2 [Source:HGNC Symbol;Acc:HGNC:19835] | N/A         |
| SCYL1       | SCY1 like pseudokinase 1 [Source:HGNC Symbol;Acc:HGNC:14372]                                    | N/A         |

| <b>Gene</b> | <b>Description</b>                                                                              | <b>Rank</b> |
|-------------|-------------------------------------------------------------------------------------------------|-------------|
| DHFRL1      | dihydrofolate reductase like 1 [Source:HGNC Symbol;Acc:HGNC:27309]                              | N/A         |
| NATD1       | N-acetyltransferase domain containing 1 [Source:HGNC Symbol;Acc:HGNC:30770]                     | N/A         |
| IQGAP3      | IQ motif containing GTPase activating protein 3 [Source:HGNC Symbol;Acc:HGNC:20669]             | N/A         |
| MMS22L      | MMS22 like, DNA repair protein [Source:HGNC Symbol;Acc:HGNC:21475]                              | N/A         |
| BTBD11      | BTB domain containing 11 [Source:HGNC Symbol;Acc:HGNC:23844]                                    | N/A         |
| PITPNM2     | phosphatidylinositol transfer protein membrane associated 2 [Source:HGNC Symbol;Acc:HGNC:21044] | N/A         |
| N4BP2L2     | NEDD4 binding protein 2-like 2 [Source:HGNC Symbol;Acc:HGNC:26916]                              | N/A         |
| RTN4RL1     | reticulon 4 receptor like 1 [Source:HGNC Symbol;Acc:HGNC:21329]                                 | N/A         |
| IGF2BP1     | insulin like growth factor 2 mRNA binding protein 1 [Source:HGNC Symbol;Acc:HGNC:28866]         | N/A         |
| GPR26       | G protein-coupled receptor 26 [Source:HGNC Symbol;Acc:HGNC:4481]                                | N/A         |
| MLXIP       | MLX interacting protein [Source:HGNC Symbol;Acc:HGNC:17055]                                     | N/A         |
| BEND7       | BEN domain containing 7 [Source:HGNC Symbol;Acc:HGNC:23514]                                     | N/A         |
| CEP120      | centrosomal protein 120 [Source:HGNC Symbol;Acc:HGNC:26690]                                     | N/A         |
| KLHL32      | kelch like family member 32 [Source:HGNC Symbol;Acc:HGNC:21221]                                 | N/A         |
| SGO1        | shugoshin 1 [Source:HGNC Symbol;Acc:HGNC:25088]                                                 | N/A         |
| ACSS1       | acyl-CoA synthetase short-chain family member 1 [Source:HGNC Symbol;Acc:HGNC:16091]             | N/A         |
| TMEM18      | transmembrane protein 18 [Source:HGNC Symbol;Acc:HGNC:25257]                                    | N/A         |
| TFAP2D      | transcription factor AP-2 delta [Source:HGNC Symbol;Acc:HGNC:15581]                             | N/A         |
| SYT16       | synaptotagmin 16 [Source:HGNC Symbol;Acc:HGNC:23142]                                            | N/A         |
| JAKMIP3     | Janus kinase and microtubule interacting protein 3 [Source:HGNC Symbol;Acc:HGNC:23523]          | N/A         |
| METTLL15    | methyltransferase like 15 [Source:HGNC Symbol;Acc:HGNC:26606]                                   | N/A         |
| VGLL3       | vestigial like family member 3 [Source:HGNC Symbol;Acc:HGNC:24327]                              | N/A         |
| SCLT1       | sodium channel and clathrin linker 1 [Source:HGNC Symbol;Acc:HGNC:26406]                        | N/A         |
| ADCY3       | adenylate cyclase 3 [Source:HGNC Symbol;Acc:HGNC:234]                                           | N/A         |
| DNAJC27     | DnaJ heat shock protein family (Hsp40) member C27 [Source:HGNC Symbol;Acc:HGNC:30290]           | N/A         |

| <b>Gene</b> | <b>Description</b>                                                                                   | <b>Rank</b> |
|-------------|------------------------------------------------------------------------------------------------------|-------------|
| TECRL       | trans-2,3-enoyl-CoA reductase-like [Source:HGNC Symbol;Acc:HGNC:27365]                               | N/A         |
| ZFHX4       | zinc finger homeobox 4 [Source:HGNC Symbol;Acc:HGNC:30939]                                           | N/A         |
| PARD3B      | par-3 family cell polarity regulator beta [Source:HGNC Symbol;Acc:HGNC:14446]                        | N/A         |
| C18orf8     | chromosome 18 open reading frame 8 [Source:HGNC Symbol;Acc:HGNC:24326]                               | N/A         |
| PGPEP1      | pyroglutamyl-peptidase I [Source:HGNC Symbol;Acc:HGNC:13568]                                         | N/A         |
| TLL11       | tubulin tyrosine ligase like 11 [Source:HGNC Symbol;Acc:HGNC:18113]                                  | N/A         |
| CADM2       | cell adhesion molecule 2 [Source:HGNC Symbol;Acc:HGNC:29849]                                         | N/A         |
| KANSL1      | KAT8 regulatory NSL complex subunit 1 [Source:HGNC Symbol;Acc:HGNC:24565]                            | N/A         |
| PCGF5       | polycomb group ring finger 5 [Source:HGNC Symbol;Acc:HGNC:28264]                                     | N/A         |
| TEX29       | testis expressed 29 [Source:HGNC Symbol;Acc:HGNC:20370]                                              | N/A         |
| MINK1       | misshapen like kinase 1 [Source:HGNC Symbol;Acc:HGNC:17565]                                          | N/A         |
| LRFN2       | leucine rich repeat and fibronectin type III domain containing 2 [Source:HGNC Symbol;Acc:HGNC:21226] | N/A         |
| MRPL39      | mitochondrial ribosomal protein L39 [Source:HGNC Symbol;Acc:HGNC:14027]                              | N/A         |
| TAOK2       | TAO kinase 2 [Source:HGNC Symbol;Acc:HGNC:16835]                                                     | N/A         |
| R3HCC1L     | R3H domain and coiled-coil containing 1 like [Source:HGNC Symbol;Acc:HGNC:23512]                     | N/A         |
| CRTAC1      | cartilage acidic protein 1 [Source:HGNC Symbol;Acc:HGNC:14882]                                       | N/A         |
| MAST2       | microtubule associated serine/threonine kinase 2 [Source:HGNC Symbol;Acc:HGNC:19035]                 | N/A         |
| CCDC171     | coiled-coil domain containing 171 [Source:HGNC Symbol;Acc:HGNC:29828]                                | N/A         |
| FBXL17      | F-box and leucine rich repeat protein 17 [Source:HGNC Symbol;Acc:HGNC:13615]                         | N/A         |
| RPTOR       | regulatory associated protein of MTOR complex 1 [Source:HGNC Symbol;Acc:HGNC:30287]                  | N/A         |
| AGBL4       | ATP/GTP binding protein-like 4 [Source:HGNC Symbol;Acc:HGNC:25892]                                   | N/A         |
| HHLA2       | HERV-H LTR-associating 2 [Source:HGNC Symbol;Acc:HGNC:4905]                                          | N/A         |
| MACF1       | microtubule-actin crosslinking factor 1 [Source:HGNC Symbol;Acc:HGNC:13664]                          | N/A         |

| <b>Gene</b> | <b>Description</b>                                                                                          | <b>Rank</b> |
|-------------|-------------------------------------------------------------------------------------------------------------|-------------|
| PIK3C2G     | phosphatidylinositol-4-phosphate 3-kinase catalytic subunit type 2 gamma [Source:HGNC Symbol;Acc:HGNC:8973] | N/A         |
| LONRF2      | LON peptidase N-terminal domain and ring finger 2 [Source:HGNC Symbol;Acc:HGNC:24788]                       | N/A         |
| TNNI3K      | TNNI3 interacting kinase [Source:HGNC Symbol;Acc:HGNC:19661]                                                | N/A         |
| SEC16B      | SEC16 homolog B, endoplasmic reticulum export factor [Source:HGNC Symbol;Acc:HGNC:30301]                    | N/A         |
| STOML1      | stomatin like 1 [Source:HGNC Symbol;Acc:HGNC:14560]                                                         | N/A         |
| MAST3       | microtubule associated serine/threonine kinase 3 [Source:HGNC Symbol;Acc:HGNC:19036]                        | N/A         |
| NEXN        | nexilin F-actin binding protein [Source:HGNC Symbol;Acc:HGNC:29557]                                         | N/A         |
| IRX1        | iroquois homeobox 1 [Source:HGNC Symbol;Acc:HGNC:14358]                                                     | N/A         |
| NEGR1       | neuronal growth regulator 1 [Source:HGNC Symbol;Acc:HGNC:17302]                                             | N/A         |
| GNPDA2      | glucosamine-6-phosphate deaminase 2 [Source:HGNC Symbol;Acc:HGNC:21526]                                     | N/A         |
| UBASH3B     | ubiquitin associated and SH3 domain containing B [Source:HGNC Symbol;Acc:HGNC:29884]                        | N/A         |
| CHMP3       | charged multivesicular body protein 3 [Source:HGNC Symbol;Acc:HGNC:29865]                                   | N/A         |
| UPK3B       | uropod protein 3B [Source:HGNC Symbol;Acc:HGNC:21444]                                                       | N/A         |
| CSMD2       | CUB and Sushi multiple domains 2 [Source:HGNC Symbol;Acc:HGNC:19290]                                        | N/A         |
| GTF3A       | general transcription factor IIIA [Source:HGNC Symbol;Acc:HGNC:4662]                                        | N/A         |
| HTR1F       | 5-hydroxytryptamine receptor 1F [Source:HGNC Symbol;Acc:HGNC:5292]                                          | N/A         |
| SDCCAG8     | serologically defined colon cancer antigen 8 [Source:HGNC Symbol;Acc:HGNC:10671]                            | N/A         |
| TNRC6A      | trinucleotide repeat containing 6A [Source:HGNC Symbol;Acc:HGNC:11969]                                      | N/A         |
| POC1B       | POC1 centriolar protein B [Source:HGNC Symbol;Acc:HGNC:30836]                                               | N/A         |
| ANAPC4      | anaphase promoting complex subunit 4 [Source:HGNC Symbol;Acc:HGNC:19990]                                    | N/A         |
| ZBTB7B      | zinc finger and BTB domain containing 7B [Source:HGNC Symbol;Acc:HGNC:18668]                                | N/A         |
| DCAF4       | DDB1 and CUL4 associated factor 4 [Source:HGNC Symbol;Acc:HGNC:19990]                                       | N/A         |

| <b>Gene</b> | <b>Description</b>                                                                              | <b>Rank</b> |
|-------------|-------------------------------------------------------------------------------------------------|-------------|
|             | 20229]                                                                                          |             |
| DCAF7       | DDB1 and CUL4 associated factor 7 [Source:HGNC Symbol;Acc:HGNC:30915]                           | N/A         |
| LINGO1      | leucine rich repeat and Ig domain containing 1 [Source:HGNC Symbol;Acc:HGNC:21205]              | N/A         |
| SHTN1       | shootin 1 [Source:HGNC Symbol;Acc:HGNC:29319]                                                   | N/A         |
| HCAR1       | hydroxycarboxylic acid receptor 1 [Source:HGNC Symbol;Acc:HGNC:4532]                            | N/A         |
| GCNT4       | glucosaminyl (N-acetyl) transferase 4, core 2 [Source:HGNC Symbol;Acc:HGNC:17973]               | N/A         |
| FTO         | fat mass and obesity associated [Source:HGNC Symbol;Acc:HGNC:24678]                             | N/A         |
| ZNF764      | zinc finger protein 764 [Source:HGNC Symbol;Acc:HGNC:28200]                                     | N/A         |
| MON1A       | MON1 homolog A, secretory trafficking associated [Source:HGNC Symbol;Acc:HGNC:28207]            | N/A         |
| PACS1       | phosphofurin acidic cluster sorting protein 1 [Source:HGNC Symbol;Acc:HGNC:30032]               | N/A         |
| HRH4        | histamine receptor H4 [Source:HGNC Symbol;Acc:HGNC:17383]                                       | N/A         |
| BMP8A       | bone morphogenetic protein 8a [Source:HGNC Symbol;Acc:HGNC:21650]                               | N/A         |
| TSHZ2       | teashirt zinc finger homeobox 2 [Source:HGNC Symbol;Acc:HGNC:13010]                             | N/A         |
| PPP1R3A     | protein phosphatase 1 regulatory subunit 3A [Source:HGNC Symbol;Acc:HGNC:9291]                  | N/A         |
| ANKS1B      | ankyrin repeat and sterile alpha motif domain containing 1B [Source:HGNC Symbol;Acc:HGNC:24600] | N/A         |
| ANTXR2      | anthrax toxin receptor 2 [Source:HGNC Symbol;Acc:HGNC:21732]                                    | N/A         |
| GRID1       | glutamate ionotropic receptor delta type subunit 1 [Source:HGNC Symbol;Acc:HGNC:4575]           | N/A         |
| TRIM66      | tripartite motif containing 66 [Source:HGNC Symbol;Acc:HGNC:29005]                              | N/A         |
| RAB27B      | RAB27B, member RAS oncogene family [Source:HGNC Symbol;Acc:HGNC:9767]                           | N/A         |
| BOD1        | biorientation of chromosomes in cell division 1 [Source:HGNC Symbol;Acc:HGNC:25114]             | N/A         |
| DNAJC11     | DnaJ heat shock protein family (Hsp40) member C11 [Source:HGNC Symbol;Acc:HGNC:25570]           | N/A         |
| YEATS2      | YEATS domain containing 2 [Source:HGNC Symbol;Acc:HGNC:25489]                                   | N/A         |

| <b>Gene</b> | <b>Description</b>                                                                                                | <b>Rank</b> |
|-------------|-------------------------------------------------------------------------------------------------------------------|-------------|
| MCTP1       | multiple C2 and transmembrane domain containing 1 [Source:HGNC Symbol;Acc:HGNC:26183]                             | N/A         |
| PIAS4       | protein inhibitor of activated STAT 4 [Source:HGNC Symbol;Acc:HGNC:17002]                                         | N/A         |
| RANBP17     | RAN binding protein 17 [Source:HGNC Symbol;Acc:HGNC:14428]                                                        | N/A         |
| MSRA        | methionine sulfoxide reductase A [Source:HGNC Symbol;Acc:HGNC:7377]                                               | N/A         |
| MC4R        | melanocortin 4 receptor [Source:HGNC Symbol;Acc:HGNC:6932]                                                        | N/A         |
| RSRC1       | arginine and serine rich coiled-coil 1 [Source:HGNC Symbol;Acc:HGNC:24152]                                        | N/A         |
| CHFR        | checkpoint with forkhead and ring finger domains, E3 ubiquitin protein ligase [Source:HGNC Symbol;Acc:HGNC:20455] | N/A         |
| MRPS9       | mitochondrial ribosomal protein S9 [Source:HGNC Symbol;Acc:HGNC:14501]                                            | N/A         |
| ZNF462      | zinc finger protein 462 [Source:HGNC Symbol;Acc:HGNC:21684]                                                       | N/A         |
| RASGRF1     | Ras protein specific guanine nucleotide releasing factor 1 [Source:HGNC Symbol;Acc:HGNC:9875]                     | N/A         |
| TEX10       | testis expressed 10 [Source:HGNC Symbol;Acc:HGNC:25988]                                                           | N/A         |
| MFSD9       | major facilitator superfamily domain containing 9 [Source:HGNC Symbol;Acc:HGNC:28158]                             | N/A         |
| HTR1A       | 5-hydroxytryptamine receptor 1A [Source:HGNC Symbol;Acc:HGNC:5286]                                                | N/A         |
| EDEM3       | ER degradation enhancing alpha-mannosidase like protein 3 [Source:HGNC Symbol;Acc:HGNC:16787]                     | N/A         |
| RAD54B      | RAD54 homolog B ( <i>S. cerevisiae</i> ) [Source:HGNC Symbol;Acc:HGNC:17228]                                      | N/A         |
| DNM1        | dynamamin 1 [Source:HGNC Symbol;Acc:HGNC:2972]                                                                    | N/A         |
| THUMP2      | THUMP domain containing 2 [Source:HGNC Symbol;Acc:HGNC:14890]                                                     | N/A         |
| RBM19       | RNA binding motif protein 19 [Source:HGNC Symbol;Acc:HGNC:29098]                                                  | N/A         |
| NAALAD2     | N-acetylated alpha-linked acidic dipeptidase 2 [Source:HGNC Symbol;Acc:HGNC:14526]                                | N/A         |
| CIPC        | CLOCK-interacting pacemaker [Source:HGNC Symbol;Acc:HGNC:20365]                                                   | N/A         |
| HYAL3       | hyaluronoglucosaminidase 3 [Source:HGNC Symbol;Acc:HGNC:5322]                                                     | N/A         |
| HAS3        | hyaluronan synthase 3 [Source:HGNC Symbol;Acc:HGNC:4820]                                                          | N/A         |
| RGS12       | regulator of G-protein signaling 12 [Source:HGNC Symbol;Acc:HGNC:                                                 | N/A         |

| <b>Gene</b> | <b>Description</b>                                                                               | <b>Rank</b> |
|-------------|--------------------------------------------------------------------------------------------------|-------------|
|             | 9994]                                                                                            |             |
| IFT57       | intraflagellar transport 57 [Source:HGNC Symbol;Acc:HGNC:17367]                                  | N/A         |
| NDE1        | nudE neurodevelopment protein 1 [Source:HGNC Symbol;Acc:HGNC:17619]                              | N/A         |
| MCTP2       | multiple C2 domains, transmembrane 2 [Source:HGNC Symbol;Acc:HGNC:25636]                         | N/A         |
| PKHD1       | polycystic kidney and hepatic disease 1 (autosomal recessive) [Source:HGNC Symbol;Acc:HGNC:9016] | N/A         |
| HS6ST3      | heparan sulfate 6-O-sulfotransferase 3 [Source:HGNC Symbol;Acc:HGNC:19134]                       | N/A         |
| METTL4      | methyltransferase like 4 [Source:HGNC Symbol;Acc:HGNC:24726]                                     | N/A         |
| KCNB2       | potassium voltage-gated channel subfamily B member 2 [Source:HGNC Symbol;Acc:HGNC:6232]          | N/A         |
| SAE1        | SUMO1 activating enzyme subunit 1 [Source:HGNC Symbol;Acc:HGNC:30660]                            | N/A         |
| WSCD2       | WSC domain containing 2 [Source:HGNC Symbol;Acc:HGNC:29117]                                      | N/A         |
| SEC31B      | SEC31 homolog B, COPII coat complex component [Source:HGNC Symbol;Acc:HGNC:23197]                | N/A         |
| IPO9        | importin 9 [Source:HGNC Symbol;Acc:HGNC:19425]                                                   | N/A         |
| OLA1        | Obg-like ATPase 1 [Source:HGNC Symbol;Acc:HGNC:28833]                                            | N/A         |
| ZKSCAN5     | zinc finger with KRAB and SCAN domains 5 [Source:HGNC Symbol;Acc:HGNC:12867]                     | N/A         |
| DOPEY1      | dopey family member 1 [Source:HGNC Symbol;Acc:HGNC:21194]                                        | N/A         |
| GRP         | gastrin releasing peptide [Source:HGNC Symbol;Acc:HGNC:4605]                                     | N/A         |
| CRTC1       | CREB regulated transcription coactivator 1 [Source:HGNC Symbol;Acc:HGNC:16062]                   | N/A         |
| ARPP21      | cAMP regulated phosphoprotein 21 [Source:HGNC Symbol;Acc:HGNC:16968]                             | N/A         |
| ADCY9       | adenylate cyclase 9 [Source:HGNC Symbol;Acc:HGNC:240]                                            | N/A         |
| GALNT13     | polypeptide N-acetylgalactosaminyltransferase 13 [Source:HGNC Symbol;Acc:HGNC:23242]             | N/A         |
| SLF2        | SMC5-SMC6 complex localization factor 2 [Source:HGNC Symbol;Acc:HGNC:17814]                      | N/A         |
| ECE2        | endothelin converting enzyme 2 [Source:HGNC Symbol;Acc:HGNC:13275]                               | N/A         |
| NCF1        | neutrophil cytosolic factor 1 [Source:HGNC Symbol;Acc:HGNC:7660]                                 | N/A         |

| <b>Gene</b> | <b>Description</b>                                                                                     | <b>Rank</b> |
|-------------|--------------------------------------------------------------------------------------------------------|-------------|
| CADM1       | cell adhesion molecule 1 [Source:HGNC Symbol;Acc:HGNC:5951]                                            | N/A         |
| SMG6        | SMG6, nonsense mediated mRNA decay factor [Source:HGNC Symbol;Acc:HGNC:17809]                          | N/A         |
| UNC5D       | unc-5 netrin receptor D [Source:HGNC Symbol;Acc:HGNC:18634]                                            | N/A         |
| CEP192      | centrosomal protein 192 [Source:HGNC Symbol;Acc:HGNC:25515]                                            | N/A         |
| ZMIZ2       | zinc finger MIZ-type containing 2 [Source:HGNC Symbol;Acc:HGNC:22229]                                  | N/A         |
| SMG5        | SMG5, nonsense mediated mRNA decay factor [Source:HGNC Symbol;Acc:HGNC:24644]                          | N/A         |
| ADARB1      | adenosine deaminase, RNA specific B1 [Source:HGNC Symbol;Acc:HGNC:226]                                 | N/A         |
| MFAP3       | microfibrillar associated protein 3 [Source:HGNC Symbol;Acc:HGNC:7034]                                 | N/A         |
| IGHMBP2     | immunoglobulin mu binding protein 2 [Source:HGNC Symbol;Acc:HGNC:5542]                                 | N/A         |
| KCNK3       | potassium two pore domain channel subfamily K member 3 [Source:HGNC Symbol;Acc:HGNC:6278]              | N/A         |
| SNX19       | sorting nexin 19 [Source:HGNC Symbol;Acc:HGNC:21532]                                                   | N/A         |
| DIDO1       | death inducer-obliterator 1 [Source:HGNC Symbol;Acc:HGNC:2680]                                         | N/A         |
| AKAP6       | A-kinase anchoring protein 6 [Source:HGNC Symbol;Acc:HGNC:376]                                         | N/A         |
| B3GALNT1    | beta-1,3-N-acetylgalactosaminyltransferase 1 (globoside blood group) [Source:HGNC Symbol;Acc:HGNC:918] | N/A         |
| PRMT6       | protein arginine methyltransferase 6 [Source:HGNC Symbol;Acc:HGNC:18241]                               | N/A         |
| NOP14       | NOP14 nucleolar protein [Source:HGNC Symbol;Acc:HGNC:16821]                                            | N/A         |
| EFEMP2      | EGF containing fibulin like extracellular matrix protein 2 [Source:HGNC Symbol;Acc:HGNC:3219]          | N/A         |
| KCNH2       | potassium voltage-gated channel subfamily H member 2 [Source:HGNC Symbol;Acc:HGNC:6251]                | N/A         |
| LAT         | linker for activation of T-cells [Source:HGNC Symbol;Acc:HGNC:18874]                                   | N/A         |
| LMX1B       | LIM homeobox transcription factor 1 beta [Source:HGNC Symbol;Acc:HGNC:6654]                            | N/A         |
| CACNA1C     | calcium voltage-gated channel subunit alpha1 C [Source:HGNC Symbol;Acc:HGNC:1390]                      | N/A         |
| NUP88       | nucleoporin 88 [Source:HGNC Symbol;Acc:HGNC:8067]                                                      | N/A         |
| UTP4        | UTP4, small subunit processome component [Source:HGNC Symbol;                                          | N/A         |



| <b>Gene</b> | <b>Description</b>                                                                             | <b>Rank</b> |
|-------------|------------------------------------------------------------------------------------------------|-------------|
|             | Acc:HGNC:1983]                                                                                 |             |
| OLFM4       | olfactomedin 4 [Source:HGNC Symbol;Acc:HGNC:17190]                                             | N/A         |
| B3GAT1      | beta-1,3-glucuronyltransferase 1 [Source:HGNC Symbol;Acc:HGNC:921]                             | N/A         |
| ADPGK       | ADP dependent glucokinase [Source:HGNC Symbol;Acc:HGNC:25250]                                  | N/A         |
| BTBD2       | BTB domain containing 2 [Source:HGNC Symbol;Acc:HGNC:15504]                                    | N/A         |
| ETAA1       | Ewing tumor associated antigen 1 [Source:HGNC Symbol;Acc:HGNC:24648]                           | N/A         |
| FANCL       | Fanconi anemia complementation group L [Source:HGNC Symbol;Acc:HGNC:20748]                     | N/A         |
| HYAL1       | hyaluronoglucosaminidase 1 [Source:HGNC Symbol;Acc:HGNC:5320]                                  | N/A         |
| PDZK1IP1    | PDZK1 interacting protein 1 [Source:HGNC Symbol;Acc:HGNC:16887]                                | N/A         |
| ENTPD6      | ectonucleoside triphosphate diphosphohydrolase 6 (putative) [Source:HGNC Symbol;Acc:HGNC:3368] | N/A         |
| GATA2       | GATA binding protein 2 [Source:HGNC Symbol;Acc:HGNC:4171]                                      | N/A         |
| PCCB        | propionyl-CoA carboxylase beta subunit [Source:HGNC Symbol;Acc:HGNC:8654]                      | N/A         |
| GADD45G     | growth arrest and DNA damage inducible gamma [Source:HGNC Symbol;Acc:HGNC:4097]                | N/A         |
| BANK1       | B-cell scaffold protein with ankyrin repeats 1 [Source:HGNC Symbol;Acc:HGNC:18233]             | N/A         |
| CDH9        | cadherin 9 [Source:HGNC Symbol;Acc:HGNC:1768]                                                  | N/A         |
| PML         | promyelocytic leukemia [Source:HGNC Symbol;Acc:HGNC:9113]                                      | N/A         |
| KLC1        | kinesin light chain 1 [Source:HGNC Symbol;Acc:HGNC:6387]                                       | N/A         |
| BRSK2       | BR serine/threonine kinase 2 [Source:HGNC Symbol;Acc:HGNC:11405]                               | N/A         |
| CELF1       | CUGBP, Elav-like family member 1 [Source:HGNC Symbol;Acc:HGNC:2549]                            | N/A         |
| POMC        | proopiomelanocortin [Source:HGNC Symbol;Acc:HGNC:9201]                                         | N/A         |
| HSD17B12    | hydroxysteroid 17-beta dehydrogenase 12 [Source:HGNC Symbol;Acc:HGNC:18646]                    | N/A         |
| MAD1L1      | MAD1 mitotic arrest deficient like 1 [Source:HGNC Symbol;Acc:HGNC:6762]                        | N/A         |
| CCNE1       | cyclin E1 [Source:HGNC Symbol;Acc:HGNC:1589]                                                   | N/A         |
| ITIH3       | inter-alpha-trypsin inhibitor heavy chain 3 [Source:HGNC Symbol;Acc:HGNC:6168]                 | N/A         |
| DZIP3       | DAZ interacting zinc finger protein 3 [Source:HGNC Symbol;Acc:HGNC:30938]                      | N/A         |

| <b>Gene</b> | <b>Description</b>                                                                                                                  | <b>Rank</b> |
|-------------|-------------------------------------------------------------------------------------------------------------------------------------|-------------|
| ZBTB16      | zinc finger and BTB domain containing 16 [Source:HGNC Symbol;Acc:HGNC:12930]                                                        | N/A         |
| DGKG        | diacylglycerol kinase gamma [Source:HGNC Symbol;Acc:HGNC:2853]                                                                      | N/A         |
| PSIP1       | PC4 and SFRS1 interacting protein 1 [Source:HGNC Symbol;Acc:HGNC:9527]                                                              | N/A         |
| SMARCC1     | SWI/SNF related, matrix associated, actin dependent regulator of chromatin subfamily c member 1 [Source:HGNC Symbol;Acc:HGNC:11104] | N/A         |
| PPP1R17     | protein phosphatase 1 regulatory subunit 17 [Source:HGNC Symbol;Acc:HGNC:16973]                                                     | N/A         |
| ATF7IP      | activating transcription factor 7 interacting protein [Source:HGNC Symbol;Acc:HGNC:20092]                                           | N/A         |
| NTHL1       | nth-like DNA glycosylase 1 [Source:HGNC Symbol;Acc:HGNC:8028]                                                                       | N/A         |
| ZMYM2       | zinc finger MYM-type containing 2 [Source:HGNC Symbol;Acc:HGNC:12989]                                                               | N/A         |
| STK35       | serine/threonine kinase 35 [Source:HGNC Symbol;Acc:HGNC:16254]                                                                      | N/A         |
| SGCZ        | sarcoglycan zeta [Source:HGNC Symbol;Acc:HGNC:14075]                                                                                | N/A         |
| PARK2       | parkin RBR E3 ubiquitin protein ligase [Source:HGNC Symbol;Acc:HGNC:8607]                                                           | N/A         |
| CPNE4       | copine 4 [Source:HGNC Symbol;Acc:HGNC:2317]                                                                                         | N/A         |
| SCN2A       | sodium voltage-gated channel alpha subunit 2 [Source:HGNC Symbol;Acc:HGNC:10588]                                                    | N/A         |
| SH3YL1      | SH3 and SYLF domain containing 1 [Source:HGNC Symbol;Acc:HGNC:29546]                                                                | N/A         |
| SLITRK6     | SLIT and NTRK like family member 6 [Source:HGNC Symbol;Acc:HGNC:23503]                                                              | N/A         |
| FOXO3       | forkhead box O3 [Source:HGNC Symbol;Acc:HGNC:3821]                                                                                  | N/A         |
| VEZF1       | vascular endothelial zinc finger 1 [Source:HGNC Symbol;Acc:HGNC:12949]                                                              | N/A         |
| COG4        | component of oligomeric golgi complex 4 [Source:HGNC Symbol;Acc:HGNC:18620]                                                         | N/A         |
| BPTF        | bromodomain PHD finger transcription factor [Source:HGNC Symbol;Acc:HGNC:3581]                                                      | N/A         |
| SLIT2       | slit guidance ligand 2 [Source:HGNC Symbol;Acc:HGNC:11086]                                                                          | N/A         |
| FUBP1       | far upstream element binding protein 1 [Source:HGNC Symbol;Acc:HGNC:4004]                                                           | N/A         |
| FOXP1       | forkhead box G1 [Source:HGNC Symbol;Acc:HGNC:3811]                                                                                  | N/A         |

| <b>Gene</b> | <b>Description</b>                                                                      | <b>Rank</b> |
|-------------|-----------------------------------------------------------------------------------------|-------------|
| BLK         | BLK proto-oncogene, Src family tyrosine kinase [Source:HGNC Symbol; Acc:HGNC:1057]      | N/A         |
| BMP2        | bone morphogenetic protein 2 [Source:HGNC Symbol;Acc:HGNC:1069]                         | N/A         |
| MDFIC       | MyoD family inhibitor domain containing [Source:HGNC Symbol;Acc:HGNC:28870]             | N/A         |
| EIF5A2      | eukaryotic translation initiation factor 5A2 [Source:HGNC Symbol;Acc:HGNC:3301]         | N/A         |
| GOLGA2      | golgin A2 [Source:HGNC Symbol;Acc:HGNC:4425]                                            | N/A         |
| DNMT3A      | DNA (cytosine-5-)-methyltransferase 3 alpha [Source:HGNC Symbol; Acc:HGNC:2978]         | N/A         |
| FHIT        | fragile histidine triad [Source:HGNC Symbol;Acc:HGNC:3701]                              | N/A         |
| VIPR1       | vasoactive intestinal peptide receptor 1 [Source:HGNC Symbol;Acc:HGNC:12694]            | N/A         |
| CENPC       | centromere protein C [Source:HGNC Symbol;Acc:HGNC:1854]                                 | N/A         |
| DHX36       | DEAH-box helicase 36 [Source:HGNC Symbol;Acc:HGNC:14410]                                | N/A         |
| MPPED2      | metallophosphoesterase domain containing 2 [Source:HGNC Symbol; Acc:HGNC:1180]          | N/A         |
| CAMK1G      | calcium/calmodulin dependent protein kinase IG [Source:HGNC Symbol; Acc:HGNC:14585]     | N/A         |
| SCRN3       | secernin 3 [Source:HGNC Symbol;Acc:HGNC:30382]                                          | N/A         |
| ZNF536      | zinc finger protein 536 [Source:HGNC Symbol;Acc:HGNC:29025]                             | N/A         |
| RABGAP1L    | RAB GTPase activating protein 1-like [Source:HGNC Symbol;Acc:HGNC:24663]                | N/A         |
| FHL2        | four and a half LIM domains 2 [Source:HGNC Symbol;Acc:HGNC:3703]                        | N/A         |
| KCND3       | potassium voltage-gated channel subfamily D member 3 [Source:HGNC Symbol;Acc:HGNC:6239] | N/A         |
| CD151       | CD151 molecule (Raph blood group) [Source:HGNC Symbol;Acc:HGNC:1630]                    | N/A         |
| MAP2K5      | mitogen-activated protein kinase kinase 5 [Source:HGNC Symbol;Acc:HGNC:6845]            | N/A         |
| TRIP12      | thyroid hormone receptor interactor 12 [Source:HGNC Symbol;Acc:HGNC:12306]              | N/A         |
| PURG        | purine rich element binding protein G [Source:HGNC Symbol;Acc:HGNC:17930]               | N/A         |
| MPO         | myeloperoxidase [Source:HGNC Symbol;Acc:HGNC:7218]                                      | N/A         |
| NFAT5       | nuclear factor of activated T-cells 5, tonicity-responsive [Source:HGNC                 | N/A         |

| <b>Gene</b> | <b>Description</b>                                                                        | <b>Rank</b> |
|-------------|-------------------------------------------------------------------------------------------|-------------|
|             | Symbol;Acc:HGNC:7774]                                                                     |             |
| RBM6        | RNA binding motif protein 6 [Source:HGNC Symbol;Acc:HGNC:9903]                            | N/A         |
| AK5         | adenylate kinase 5 [Source:HGNC Symbol;Acc:HGNC:365]                                      | N/A         |
| PMAIP1      | phorbol-12-myristate-13-acetate-induced protein 1 [Source:HGNC Symbol;Acc:HGNC:9108]      | N/A         |
| FARP1       | FERM, ARH/RhoGEF and pleckstrin domain protein 1 [Source:HGNC Symbol;Acc:HGNC:3591]       | N/A         |
| TIPARP      | TCDD inducible poly(ADP-ribose) polymerase [Source:HGNC Symbol;Acc:HGNC:23696]            | N/A         |
| APOE        | apolipoprotein E [Source:HGNC Symbol;Acc:HGNC:613]                                        | N/A         |
| COBLL1      | cordon-bleu WH2 repeat protein like 1 [Source:HGNC Symbol;Acc:HGNC:23571]                 | N/A         |
| MED23       | mediator complex subunit 23 [Source:HGNC Symbol;Acc:HGNC:2372]                            | N/A         |
| PTPRN2      | protein tyrosine phosphatase, receptor type N2 [Source:HGNC Symbol;Acc:HGNC:9677]         | N/A         |
| PATJ        | PATJ, crumbs cell polarity complex component [Source:HGNC Symbol;Acc:HGNC:28881]          | N/A         |
| UNC79       | unc-79 homolog (C. elegans) [Source:HGNC Symbol;Acc:HGNC:19966]                           | N/A         |
| DLK1        | delta like non-canonical Notch ligand 1 [Source:HGNC Symbol;Acc:HGNC:2907]                | N/A         |
| ZNHIT3      | zinc finger HIT-type containing 3 [Source:HGNC Symbol;Acc:HGNC:12309]                     | N/A         |
| ZFHX3       | zinc finger homeobox 3 [Source:HGNC Symbol;Acc:HGNC:777]                                  | N/A         |
| ARNTL       | aryl hydrocarbon receptor nuclear translocator like [Source:HGNC Symbol;Acc:HGNC:701]     | N/A         |
| SLC39A8     | solute carrier family 39 member 8 [Source:HGNC Symbol;Acc:HGNC:20862]                     | N/A         |
| PIK3C3      | phosphatidylinositol 3-kinase catalytic subunit type 3 [Source:HGNC Symbol;Acc:HGNC:8974] | N/A         |
| WNK1        | WNK lysine deficient protein kinase 1 [Source:HGNC Symbol;Acc:HGNC:14540]                 | N/A         |
| POU6F2      | POU class 6 homeobox 2 [Source:HGNC Symbol;Acc:HGNC:21694]                                | N/A         |
| ZEB2        | zinc finger E-box binding homeobox 2 [Source:HGNC Symbol;Acc:HGNC:14881]                  | N/A         |
| SCG3        | secretogranin III [Source:HGNC Symbol;Acc:HGNC:13707]                                     | N/A         |
| STIM2       | stromal interaction molecule 2 [Source:HGNC Symbol;Acc:HGNC:19205]                        | N/A         |

| <b>Gene</b> | <b>Description</b>                                                                                | <b>Rank</b> |
|-------------|---------------------------------------------------------------------------------------------------|-------------|
| BRINP3      | BMP/retinoic acid inducible neural specific 3 [Source:HGNC Symbol; Acc:HGNC:22393]                | N/A         |
| SKAP1       | src kinase associated phosphoprotein 1 [Source:HGNC Symbol;Acc: HGNC:15605]                       | N/A         |
| OPCML       | opioid binding protein/cell adhesion molecule-like [Source:HGNC Symbol;Acc:HGNC:8143]             | N/A         |
| STXBP6      | syntaxin binding protein 6 [Source:HGNC Symbol;Acc:HGNC:19666]                                    | N/A         |
| GBE1        | glucan (1,4-alpha-), branching enzyme 1 [Source:HGNC Symbol;Acc: HGNC:4180]                       | N/A         |
| HNF4G       | hepatocyte nuclear factor 4 gamma [Source:HGNC Symbol;Acc:HGNC: 5026]                             | N/A         |
| PTPRD       | protein tyrosine phosphatase, receptor type D [Source:HGNC Symbol; Acc:HGNC:9668]                 | N/A         |
| ACVR2A      | activin A receptor type 2A [Source:HGNC Symbol;Acc:HGNC:173]                                      | N/A         |
| KCTD15      | potassium channel tetramerization domain containing 15 [Source:HGNC Symbol;Acc:HGNC:23297]        | N/A         |
| ADD1        | adducin 1 [Source:HGNC Symbol;Acc:HGNC:243]                                                       | N/A         |
| HHIP        | hedgehog interacting protein [Source:HGNC Symbol;Acc:HGNC:14866]                                  | N/A         |
| PTBP2       | polypyrimidine tract binding protein 2 [Source:HGNC Symbol;Acc: HGNC:17662]                       | N/A         |
| DPYD        | dihydropyrimidine dehydrogenase [Source:HGNC Symbol;Acc:HGNC: 3012]                               | N/A         |
| HIVEP2      | human immunodeficiency virus type I enhancer binding protein 2 [Source:HGNC Symbol;Acc:HGNC:4921] | N/A         |
| VRK2        | vaccinia related kinase 2 [Source:HGNC Symbol;Acc:HGNC:12719]                                     | N/A         |
| GRIA1       | glutamate ionotropic receptor AMPA type subunit 1 [Source:HGNC Symbol;Acc:HGNC:4571]              | N/A         |
| NPTX1       | neuronal pentraxin 1 [Source:HGNC Symbol;Acc:HGNC:7952]                                           | N/A         |
| CXXC5       | CXXC finger protein 5 [Source:HGNC Symbol;Acc:HGNC:26943]                                         | N/A         |
| PLCL1       | phospholipase C like 1 [Source:HGNC Symbol;Acc:HGNC:9063]                                         | N/A         |
| TRAF3       | TNF receptor associated factor 3 [Source:HGNC Symbol;Acc:HGNC: 12033]                             | N/A         |
| MAN1A1      | mannosidase alpha class 1A member 1 [Source:HGNC Symbol;Acc: HGNC:6821]                           | N/A         |
| SOCS5       | suppressor of cytokine signaling 5 [Source:HGNC Symbol;Acc:HGNC: 16852]                           | N/A         |

| <b>Gene</b> | <b>Description</b>                                                                            | <b>Rank</b> |
|-------------|-----------------------------------------------------------------------------------------------|-------------|
| CADPS       | calcium dependent secretion activator [Source:HGNC Symbol;Acc:HGNC:1426]                      | N/A         |
| CPS1        | carbamoyl-phosphate synthase 1 [Source:HGNC Symbol;Acc:HGNC:2323]                             | N/A         |
| MSI2        | musashi RNA binding protein 2 [Source:HGNC Symbol;Acc:HGNC:18585]                             | N/A         |
| PCDH17      | protocadherin 17 [Source:HGNC Symbol;Acc:HGNC:14267]                                          | N/A         |
| RTN4        | reticulon 4 [Source:HGNC Symbol;Acc:HGNC:14085]                                               | N/A         |
| ETS2        | ETS proto-oncogene 2, transcription factor [Source:HGNC Symbol;Acc:HGNC:3489]                 | N/A         |
| CAST        | calpastatin [Source:HGNC Symbol;Acc:HGNC:1515]                                                | N/A         |
| PDZRN4      | PDZ domain containing ring finger 4 [Source:HGNC Symbol;Acc:HGNC:30552]                       | N/A         |
| HMBS        | hydroxymethylbilane synthase [Source:HGNC Symbol;Acc:HGNC:4982]                               | N/A         |
| RBL2        | RB transcriptional corepressor like 2 [Source:HGNC Symbol;Acc:HGNC:9894]                      | N/A         |
| CTBP2       | C-terminal binding protein 2 [Source:HGNC Symbol;Acc:HGNC:2495]                               | N/A         |
| EIF2S2      | eukaryotic translation initiation factor 2 subunit beta [Source:HGNC Symbol;Acc:HGNC:3266]    | N/A         |
| CRIM1       | cysteine rich transmembrane BMP regulator 1 (chordin-like) [Source:HGNC Symbol;Acc:HGNC:2359] | N/A         |
| TFAP2B      | transcription factor AP-2 beta [Source:HGNC Symbol;Acc:HGNC:11743]                            | N/A         |
| PCDH18      | protocadherin 18 [Source:HGNC Symbol;Acc:HGNC:14268]                                          | N/A         |
| AFF3        | AF4/FMR2 family member 3 [Source:HGNC Symbol;Acc:HGNC:6473]                                   | N/A         |
| UBE2E3      | ubiquitin conjugating enzyme E2 E3 [Source:HGNC Symbol;Acc:HGNC:12479]                        | N/A         |
| NRXN1       | neurexin 1 [Source:HGNC Symbol;Acc:HGNC:8008]                                                 | N/A         |
| AKT3        | AKT serine/threonine kinase 3 [Source:HGNC Symbol;Acc:HGNC:393]                               | N/A         |
| AXIN1       | axin 1 [Source:HGNC Symbol;Acc:HGNC:903]                                                      | N/A         |
| NFIL3       | nuclear factor, interleukin 3 regulated [Source:HGNC Symbol;Acc:HGNC:7787]                    | N/A         |
| BCL7A       | B-cell CLL/lymphoma 7A [Source:HGNC Symbol;Acc:HGNC:1004]                                     | N/A         |
| BDNF        | brain derived neurotrophic factor [Source:HGNC Symbol;Acc:HGNC:1033]                          | N/A         |
| PDE4B       | phosphodiesterase 4B [Source:HGNC Symbol;Acc:HGNC:8781]                                       | N/A         |
| CCND1       | cyclin D1 [Source:HGNC Symbol;Acc:HGNC:1582]                                                  | N/A         |

| <b>Gene</b> | <b>Description</b>                                                                                       | <b>Rank</b> |
|-------------|----------------------------------------------------------------------------------------------------------|-------------|
| NLGN1       | neuroligin 1 [Source:HGNC Symbol;Acc:HGNC:14291]                                                         | N/A         |
| SOX11       | SRY-box 11 [Source:HGNC Symbol;Acc:HGNC:11191]                                                           | N/A         |
| SSBP2       | single stranded DNA binding protein 2 [Source:HGNC Symbol;Acc:HGNC:15831]                                | N/A         |
| RIT2        | Ras like without CAAX 2 [Source:HGNC Symbol;Acc:HGNC:10017]                                              | N/A         |
| STAG1       | stromal antigen 1 [Source:HGNC Symbol;Acc:HGNC:11354]                                                    | N/A         |
| HMGB1       | high mobility group box 1 [Source:HGNC Symbol;Acc:HGNC:4983]                                             | N/A         |
| MAGI2       | membrane associated guanylate kinase, WW and PDZ domain containing 2 [Source:HGNC Symbol;Acc:HGNC:18957] | N/A         |
| RELN        | reelin [Source:HGNC Symbol;Acc:HGNC:9957]                                                                | N/A         |
| NRP1        | neuropilin 1 [Source:HGNC Symbol;Acc:HGNC:8004]                                                          | N/A         |
| DUSP6       | dual specificity phosphatase 6 [Source:HGNC Symbol;Acc:HGNC:3072]                                        | N/A         |
| BCL2        | B-cell CLL/lymphoma 2 [Source:HGNC Symbol;Acc:HGNC:990]                                                  | N/A         |
| LPP         | LIM domain containing preferred translocation partner in lipoma [Source:HGNC Symbol;Acc:HGNC:6679]       | N/A         |
| NEBL        | nebullette [Source:HGNC Symbol;Acc:HGNC:16932]                                                           | N/A         |
| TRIB1       | tribbles pseudokinase 1 [Source:HGNC Symbol;Acc:HGNC:16891]                                              | N/A         |
| BNC2        | basonuclin 2 [Source:HGNC Symbol;Acc:HGNC:30988]                                                         | N/A         |
| SEL1L       | SEL1L ERAD E3 ligase adaptor subunit [Source:HGNC Symbol;Acc:HGNC:10717]                                 | N/A         |
| PTPRM       | protein tyrosine phosphatase, receptor type M [Source:HGNC Symbol;Acc:HGNC:9675]                         | N/A         |
| ERBB4       | erb-b2 receptor tyrosine kinase 4 [Source:HGNC Symbol;Acc:HGNC:3432]                                     | N/A         |
| RPS6KA5     | ribosomal protein S6 kinase A5 [Source:HGNC Symbol;Acc:HGNC:10434]                                       | N/A         |
| RBBP6       | RB binding protein 6, ubiquitin ligase [Source:HGNC Symbol;Acc:HGNC:9889]                                | N/A         |
| LGR4        | leucine rich repeat containing G protein-coupled receptor 4 [Source:HGNC Symbol;Acc:HGNC:13299]          | N/A         |
| RPA1        | replication protein A1 [Source:HGNC Symbol;Acc:HGNC:10289]                                               | N/A         |
| RARB        | retinoic acid receptor beta [Source:HGNC Symbol;Acc:HGNC:9865]                                           | N/A         |
| KIT         | KIT proto-oncogene receptor tyrosine kinase [Source:HGNC Symbol;Acc:HGNC:6342]                           | N/A         |
| TRPS1       | transcriptional repressor GATA binding 1 [Source:HGNC Symbol;Acc:HGNC:12340]                             | N/A         |

| <b>Gene</b> | <b>Description</b>                                                                         | <b>Rank</b> |
|-------------|--------------------------------------------------------------------------------------------|-------------|
| CDH13       | cadherin 13 [Source:HGNC Symbol;Acc:HGNC:1753]                                             | N/A         |
| NCOA1       | nuclear receptor coactivator 1 [Source:HGNC Symbol;Acc:HGNC:7668]                          | N/A         |
| POU4F1      | POU class 4 homeobox 1 [Source:HGNC Symbol;Acc:HGNC:9218]                                  | N/A         |
| NRXN3       | neurexin 3 [Source:HGNC Symbol;Acc:HGNC:8010]                                              | N/A         |
| ANKRD28     | ankyrin repeat domain 28 [Source:HGNC Symbol;Acc:HGNC:29024]                               | N/A         |
| BCL11B      | B-cell CLL/lymphoma 11B [Source:HGNC Symbol;Acc:HGNC:13222]                                | N/A         |
| JADE2       | jade family PHD finger 2 [Source:HGNC Symbol;Acc:HGNC:22984]                               | N/A         |
| LMO3        | LIM domain only 3 [Source:HGNC Symbol;Acc:HGNC:6643]                                       | N/A         |
| PPP1CB      | protein phosphatase 1 catalytic subunit beta [Source:HGNC Symbol;Acc:HGNC:9282]            | N/A         |
| MAML3       | mastermind like transcriptional coactivator 3 [Source:HGNC Symbol;Acc:HGNC:16272]          | N/A         |
| DLG2        | discs large MAGUK scaffold protein 2 [Source:HGNC Symbol;Acc:HGNC:2901]                    | N/A         |
| PDE4D       | phosphodiesterase 4D [Source:HGNC Symbol;Acc:HGNC:8783]                                    | N/A         |
| MEF2C       | myocyte enhancer factor 2C [Source:HGNC Symbol;Acc:HGNC:6996]                              | N/A         |
| CLOCK       | clock circadian regulator [Source:HGNC Symbol;Acc:HGNC:2082]                               | 1           |
| NOVA1       | NOVA alternative splicing regulator 1 [Source:HGNC Symbol;Acc:HGNC:7886]                   | 2           |
| BCL11A      | B-cell CLL/lymphoma 11A [Source:HGNC Symbol;Acc:HGNC:13221]                                | 3           |
| PUM2        | pumilio RNA binding family member 2 [Source:HGNC Symbol;Acc:HGNC:14958]                    | 4           |
| SP4         | Sp4 transcription factor [Source:HGNC Symbol;Acc:HGNC:11209]                               | 5           |
| SMAD3       | SMAD family member 3 [Source:HGNC Symbol;Acc:HGNC:6769]                                    | 6           |
| FBN2        | fibrillin 2 [Source:HGNC Symbol;Acc:HGNC:3604]                                             | 7           |
| BTG1        | B-cell translocation gene 1, anti-proliferative [Source:HGNC Symbol;Acc:HGNC:1130]         | 8           |
| DTNA        | dystrobrevin alpha [Source:HGNC Symbol;Acc:HGNC:3057]                                      | 9           |
| WNT5A       | Wnt family member 5A [Source:HGNC Symbol;Acc:HGNC:12784]                                   | 10          |
| DACH1       | dachshund family transcription factor 1 [Source:HGNC Symbol;Acc:HGNC:2663]                 | 11          |
| ZADH2       | zinc binding alcohol dehydrogenase domain containing 2 [Source:HGNC Symbol;Acc:HGNC:28697] | 12          |
| NR3C1       | nuclear receptor subfamily 3 group C member 1 [Source:HGNC Symbol;Acc:HGNC:7978]           | 13          |



| <b>Gene</b> | <b>Description</b>                                                                                                 | <b>Rank</b> |
|-------------|--------------------------------------------------------------------------------------------------------------------|-------------|
| CITED2      | Cbp/p300 interacting transactivator with Glu/Asp rich carboxy-terminal domain 2 [Source:HGNC Symbol;Acc:HGNC:1987] | 14          |
| GNB1        | G protein subunit beta 1 [Source:HGNC Symbol;Acc:HGNC:4396]                                                        | 15          |
| PIK3R1      | phosphoinositide-3-kinase regulatory subunit 1 [Source:HGNC Symbol;Acc:HGNC:8979]                                  | 16          |
| TOB1        | transducer of ERBB2, 1 [Source:HGNC Symbol;Acc:HGNC:11979]                                                         | 17          |
| ZIC2        | Zic family member 2 [Source:HGNC Symbol;Acc:HGNC:12873]                                                            | 18          |
| ESRRG       | estrogen related receptor gamma [Source:HGNC Symbol;Acc:HGNC:3474]                                                 | 19          |
| ANK3        | ankyrin 3, node of Ranvier (ankyrin G) [Source:HGNC Symbol;Acc:HGNC:494]                                           | 20          |

# Networks

|                                                                                                                                                                                                                                                             |               |
|-------------------------------------------------------------------------------------------------------------------------------------------------------------------------------------------------------------------------------------------------------------|---------------|
| <b>miRNA-target-predictions-2013</b>                                                                                                                                                                                                                        | <b>31.36%</b> |
| ATGTACA,MIR-493                                                                                                                                                                                                                                             | 7.72%         |
| ATGTCAC,MIR-489                                                                                                                                                                                                                                             | 5.74%         |
| AAGCACA,MIR-218                                                                                                                                                                                                                                             | 5.16%         |
| TGTATGA,MIR-485-3P                                                                                                                                                                                                                                          | 4.54%         |
| AATGTGA,MIR-23A,MIR-23B                                                                                                                                                                                                                                     | 4.21%         |
| TTTGTAG,MIR-520D                                                                                                                                                                                                                                            | 3.99%         |
| <b>Transcriptional-factor-targets-2013</b>                                                                                                                                                                                                                  | <b>21.63%</b> |
| AACTTT_UNKNOWN                                                                                                                                                                                                                                              | 6.19%         |
| TTGTTT_V\$FOXO4_01                                                                                                                                                                                                                                          | 5.40%         |
| V\$FOXD3_01                                                                                                                                                                                                                                                 | 5.15%         |
| V\$SOX5_01                                                                                                                                                                                                                                                  | 4.89%         |
| <b>Co-expression</b>                                                                                                                                                                                                                                        | <b>20.76%</b> |
| <b>Perou-Botstein-2000</b>                                                                                                                                                                                                                                  | <b>2.18%</b>  |
| Molecular portraits of human breast tumours. Perou et al (2000). <i>Nature</i><br>Co-expression with 185,068 interactions from supplementary material                                                                                                       |               |
| <b>Wang-Maris-2006</b>                                                                                                                                                                                                                                      | <b>2.13%</b>  |
| Integrative genomics identifies distinct molecular classes of neuroblastoma and shows that multiple genes are targeted by regional alterations in DNA copy number. Wang et al (2006). <i>Cancer Res</i><br>Co-expression with 264,023 interactions from GEO |               |
| <b>Alizadeh-Staudt-2000</b>                                                                                                                                                                                                                                 | <b>1.88%</b>  |
| Distinct types of diffuse large B-cell lymphoma identified by gene expression profiling. Alizadeh et al (2000). <i>Nature</i><br>Co-expression with 90,336 interactions from supplementary material                                                         |               |
| <b>Boldrick-Relman-2002</b>                                                                                                                                                                                                                                 | <b>1.42%</b>  |
| Stereotyped and specific gene expression programs in human innate immune responses to bacteria. Boldrick et al (2002). <i>Proc Natl Acad Sci U S A</i><br>Co-expression with 111,707 interactions from supplementary material                               |               |
| <b>Mallon-McKay-2013</b>                                                                                                                                                                                                                                    | <b>1.40%</b>  |
| StemCellDB: the human pluripotent stem cell database at the National Institutes of Health. Mallon et al (2013). <i>Stem Cell Res</i><br>Co-expression with 585,265 interactions from GEO                                                                    |               |
| <b>Roth-Zlotnik-2006</b>                                                                                                                                                                                                                                    | <b>1.26%</b>  |
| Gene expression analyses reveal molecular relationships among 20 regions of the human CNS. Roth et al (2006). <i>Neurogenetics</i><br>Co-expression with 669,062 interactions from GEO                                                                      |               |

| <b>Co-expression</b>                                                                                                                                                                                                                                       | <b>20.76%</b> |
|------------------------------------------------------------------------------------------------------------------------------------------------------------------------------------------------------------------------------------------------------------|---------------|
| <b>Bild-Nevins-2006 B</b>                                                                                                                                                                                                                                  | <b>1.19%</b>  |
| Oncogenic pathway signatures in human cancers as a guide to targeted therapies. Bild et al (2006). <i>Nature</i><br>Co-expression with 280,683 interactions from GEO                                                                                       |               |
| <b>Wang-Cheung-2015</b>                                                                                                                                                                                                                                    | <b>1.18%</b>  |
| Genetic variation in insulin-induced kinase signaling. Wang et al (2015). <i>Mol Syst Biol</i><br>Co-expression with 411,047 interactions from GEO                                                                                                         |               |
| <b>Burington-Shaughnessy-2008</b>                                                                                                                                                                                                                          | <b>1.03%</b>  |
| Tumor cell gene expression changes following short-term in vivo exposure to single agent chemotherapeutics are related to survival in multiple myeloma. Burington et al (2008). <i>Clin Cancer Res</i><br>Co-expression with 290,538 interactions from GEO |               |
| <b>Dobbin-Giordano-2005</b>                                                                                                                                                                                                                                | <b>1.01%</b>  |
| Interlaboratory comparability study of cancer gene expression analysis using oligonucleotide microarrays. Dobbin et al (2005). <i>Clin Cancer Res</i><br>Co-expression with 444,931 interactions from GEO                                                  |               |
| <b>Bahr-Bowler-2013</b>                                                                                                                                                                                                                                    | <b>0.97%</b>  |
| Peripheral blood mononuclear cell gene expression in chronic obstructive pulmonary disease. Bahr et al (2013). <i>Am J Respir Cell Mol Biol</i><br>Co-expression with 274,949 interactions from GEO                                                        |               |
| <b>Ramaswamy-Golub-2001</b>                                                                                                                                                                                                                                | <b>0.87%</b>  |
| Multiclass cancer diagnosis using tumor gene expression signatures. Ramaswamy et al (2001). <i>Proc Natl Acad Sci U S A</i><br>Co-expression with 275,113 interactions from supplementary material                                                         |               |
| <b>Wu-Garvey-2007</b>                                                                                                                                                                                                                                      | <b>0.81%</b>  |
| The effect of insulin on expression of genes and biochemical pathways in human skeletal muscle. Wu et al (2007). <i>Endocrine</i><br>Co-expression with 267,109 interactions from GEO                                                                      |               |
| <b>Smirnov-Cheung-2009</b>                                                                                                                                                                                                                                 | <b>0.76%</b>  |
| Genetic analysis of radiation-induced changes in human gene expression. Smirnov et al (2009). <i>Nature</i><br>Co-expression with 461,500 interactions from GEO                                                                                            |               |
| <b>Rieger-Chu-2004</b>                                                                                                                                                                                                                                     | <b>0.68%</b>  |
| Toxicity from radiation therapy associated with abnormal transcriptional responses to DNA damage. Rieger et al (2004). <i>Proc Natl Acad Sci U S A</i><br>Co-expression with 259,974 interactions from GEO                                                 |               |
| <b>Noble-Diehl-2008</b>                                                                                                                                                                                                                                    | <b>0.57%</b>  |
| Regional variation in gene expression in the healthy colon is dysregulated in ulcerative colitis. Noble et al (2008). <i>Gut</i><br>Co-expression with 661,539 interactions from GEO                                                                       |               |
| <b>Chen-Brown-2002</b>                                                                                                                                                                                                                                     | <b>0.53%</b>  |
| Gene expression patterns in human liver cancers. Chen et al (2002). <i>Mol Biol Cell</i><br>Co-expression with 282,241 interactions from supplementary material                                                                                            |               |
| <b>Rosenwald-Staudt-2001</b>                                                                                                                                                                                                                               | <b>0.39%</b>  |
| Relation of gene expression phenotype to immunoglobulin mutation genotype in B cell chronic lymphocytic leukemia. Rosenwald et al (2001). <i>J Exp Med</i><br>Co-expression with 114,694 interactions from supplementary material                          |               |

|                                                                                                                                                                                                                       |               |
|-----------------------------------------------------------------------------------------------------------------------------------------------------------------------------------------------------------------------|---------------|
| <b>Co-expression</b>                                                                                                                                                                                                  | <b>20.76%</b> |
| <b>Innocenti-Brown-2011</b>                                                                                                                                                                                           | <b>0.33%</b>  |
| Identification, replication, and functional fine-mapping of expression quantitative trait loci in primary human liver tissue. Innocenti et al (2011). <i>PLoS Genet</i>                                               |               |
| Co-expression with 603,765 interactions from GEO                                                                                                                                                                      |               |
| <b>Perou-Botstein-1999</b>                                                                                                                                                                                            | <b>0.17%</b>  |
| Distinctive gene expression patterns in human mammary epithelial cells and breast cancers. Perou et al (1999). <i>Proc Natl Acad Sci U S A</i>                                                                        |               |
| Co-expression with 65,069 interactions from supplementary material                                                                                                                                                    |               |
| <b>Physical Interactions</b>                                                                                                                                                                                          | <b>14.02%</b> |
| <b>Arroyo-Aloy-2015</b>                                                                                                                                                                                               | <b>1.99%</b>  |
| Systematic identification of molecular links between core and candidate genes in breast cancer. Arroyo et al (2015). <i>J Mol Biol</i>                                                                                |               |
| Physical Interactions with 600 interactions from iRefIndex                                                                                                                                                            |               |
| <b>Maréchal-Zou-2014</b>                                                                                                                                                                                              | <b>1.70%</b>  |
| PRP19 transforms into a sensor of RPA-ssDNA after DNA damage and drives ATR activation via a ubiquitin-mediated circuitry. Maréchal et al (2014). <i>Mol Cell</i>                                                     |               |
| Physical Interactions with 976 interactions from iRefIndex                                                                                                                                                            |               |
| <b>Jones-MacBeath-2006</b>                                                                                                                                                                                            | <b>1.69%</b>  |
| A quantitative protein interaction network for the ErbB receptors using protein microarrays. Jones et al (2006). <i>Nature</i>                                                                                        |               |
| Physical Interactions with 151 interactions from iRefIndex                                                                                                                                                            |               |
| <b>Dyer-Sobral-2010</b>                                                                                                                                                                                               | <b>1.63%</b>  |
| The human-bacterial pathogen protein interaction networks of <i>Bacillus anthracis</i> , <i>Francisella tularensis</i> , and <i>Yersinia pestis</i> . Dyer et al (2010). <i>PLoS One</i>                              |               |
| Physical Interactions with 514 interactions from iRefIndex                                                                                                                                                            |               |
| <b>Leung-Jones-2014</b>                                                                                                                                                                                               | <b>0.94%</b>  |
| Enhanced prediction of Src homology 2 (SH2) domain binding potentials using a fluorescence polarization-derived c-Met, c-Kit, ErbB, and androgen receptor interactome. Leung et al (2014). <i>Mol Cell Proteomics</i> |               |
| Physical Interactions with 190 interactions from iRefIndex                                                                                                                                                            |               |
| <b>Carmon-Liu-2014</b>                                                                                                                                                                                                | <b>0.93%</b>  |
| RSPO-LGR4 functions via IQGAP1 to potentiate Wnt signaling. Carmon et al (2014). <i>Proc Natl Acad Sci U S A</i>                                                                                                      |               |
| Physical Interactions with 197 interactions from iRefIndex                                                                                                                                                            |               |
| <b>Soler-López-Aloy-2011</b>                                                                                                                                                                                          | <b>0.84%</b>  |
| Interactome mapping suggests new mechanistic details underlying Alzheimer's disease. Soler-López et al (2011). <i>Genome Res</i>                                                                                      |               |
| Physical Interactions with 312 interactions from iRefIndex                                                                                                                                                            |               |
| <b>Lambert-Gingras-2015</b>                                                                                                                                                                                           | <b>0.76%</b>  |
| Proximity biotinylation and affinity purification are complementary approaches for the interactome mapping of chromatin-associated protein complexes. Lambert et al (2015). <i>J Proteomics</i>                       |               |
| Physical Interactions with 318 interactions from BioGRID                                                                                                                                                              |               |
| <b>Weimann-Stelzl-2013 B</b>                                                                                                                                                                                          | <b>0.72%</b>  |
| A Y2H-seq approach defines the human protein methyltransferase interactome. Weimann et al (2013). <i>Nat Methods</i>                                                                                                  |               |
| Physical Interactions with 516 interactions from BioGRID                                                                                                                                                              |               |
| <b>Weimann-Stelzl-2013 A</b>                                                                                                                                                                                          | <b>0.60%</b>  |

## Physical Interactions

14.02%

---

### Weimann-Stelzl-2013 A

A Y2H-seq approach defines the human protein methyltransferase interactome. Weimann et al (2013). *Nat Methods*

Physical Interactions with 114 interactions from BioGRID

---

### Colland-Gauthier-2004

0.49%

Functional proteomics mapping of a human signaling pathway. Colland et al (2004). *Genome Res*

Physical Interactions with 842 interactions from iRefIndex

---

### IREF-PUBMED

0.23%

Physical Interactions with 571 interactions from iRefIndex

---

### IREF-BIOGRID

0.20%

Physical Interactions with 155,470 interactions from iRefIndex

---

### Vinayagam-Wanker-2011

0.18%

A directed protein interaction network for investigating intracellular signal transduction. Vinayagam et al (2011). *Sci Signal*

Physical Interactions with 2,576 interactions from BioGRID

---

### So-Colwill-2015

0.14%

Integrative analysis of kinase networks in TRAIL-induced apoptosis provides a source of potential targets for combination therapy. So et al (2015). *Sci Signal*

Physical Interactions with 647 interactions from BioGRID

---

### Ewing-Figeys-2007

0.14%

Large-scale mapping of human protein-protein interactions by mass spectrometry. Ewing et al (2007). *Mol Syst Biol*

Physical Interactions with 5,362 interactions from iRefIndex

---

### Yu-Vidal-2011

0.14%

Next-generation sequencing to generate interactome datasets. Yu et al (2011). *Nat Methods*

Physical Interactions with 1,108 interactions from BioGRID

---

### Bandyopadhyay-Ideker-2010

0.12%

A human MAP kinase interactome. Bandyopadhyay et al (2010). *Nat Methods*

Physical Interactions with 611 interactions from iRefIndex

---

### IREF-MPPI

0.11%

Physical Interactions with 382 interactions from iRefIndex

---

### Markson-Sanderson-2009

0.11%

Analysis of the human E2 ubiquitin conjugating enzyme protein interaction network. Markson et al (2009). *Genome Res*

Physical Interactions with 700 interactions from iRefIndex

---

### IREF-HPRD

0.10%

Physical Interactions with 34,206 interactions from iRefIndex

---

### Li-Chen-2015

0.10%

Proteomic analyses reveal distinct chromatin-associated and soluble transcription factor complexes. Li et al (2015). *Mol Syst Biol*

Physical Interactions with 1,809 interactions from BioGRID

---

### BIOGRID-SMALL-SCALE-STUDIES

0.07%

Physical Interactions with 58,871 interactions from BioGRID

---

|                                                                                                                                                              |        |
|--------------------------------------------------------------------------------------------------------------------------------------------------------------|--------|
| <b>Physical Interactions</b>                                                                                                                                 | 14.02% |
| <b>Zanon-Pichler-2013</b>                                                                                                                                    | 0.05%  |
| Profiling of Parkin-binding partners using tandem affinity purification. Zanon et al (2013). <i>PLoS One</i>                                                 |        |
| Physical Interactions with 187 interactions from iRefIndex                                                                                                   |        |
| <b>Wang-Yang-2011</b>                                                                                                                                        | 0.03%  |
| Toward an understanding of the protein interaction network of the human liver. Wang et al (2011). <i>Mol Syst Biol</i>                                       |        |
| Physical Interactions with 3,408 interactions from BioGRID                                                                                                   |        |
| <b>Havugimana-Emili-2012</b>                                                                                                                                 | 0.02%  |
| A census of human soluble protein complexes. Havugimana et al (2012). <i>Cell</i>                                                                            |        |
| Physical Interactions with 13,716 interactions from BioGRID                                                                                                  |        |
| <b>Genetic Interactions</b>                                                                                                                                  | 6.39%  |
| <b>Lin-Smith-2010</b>                                                                                                                                        | 6.12%  |
| A genome-wide map of human genetic interactions inferred from radiation hybrid genotypes. Lin et al (2010). <i>Genome Res</i>                                |        |
| Genetic Interactions with 4,820,370 interactions from supplementary material                                                                                 |        |
| <b>BIOGRID-SMALL-SCALE-STUDIES</b>                                                                                                                           | 0.27%  |
| Genetic Interactions with 489 interactions from BioGRID                                                                                                      |        |
| <b>Predicted</b>                                                                                                                                             | 3.83%  |
| <b>I2D-MINT-Fly2Human</b>                                                                                                                                    | 0.80%  |
| MINT: a Molecular INTeraction database. Zanzoni et al (2002). <i>FEBS Lett</i>                                                                               |        |
| Predicted with 2,962 interactions from I2D                                                                                                                   |        |
| <b>I2D-MINT-Rat2Human</b>                                                                                                                                    | 0.57%  |
| MINT: a Molecular INTeraction database. Zanzoni et al (2002). <i>FEBS Lett</i>                                                                               |        |
| Predicted with 572 interactions from I2D                                                                                                                     |        |
| <b>I2D-vonMering-Bork-2002-High-Yeast2Human</b>                                                                                                              | 0.54%  |
| Comparative assessment of large-scale data sets of protein-protein interactions. von Mering et al (2002). <i>Nature</i>                                      |        |
| Predicted with 1,196 interactions from I2D                                                                                                                   |        |
| <b>I2D-BIND-Rat2Human</b>                                                                                                                                    | 0.51%  |
| BIND--a data specification for storing and describing biomolecular interactions, molecular complexes and pathways. Bader et al (2000). <i>Bioinformatics</i> |        |
| Predicted with 548 interactions from I2D                                                                                                                     |        |
| <b>I2D-BIND-Fly2Human</b>                                                                                                                                    | 0.43%  |
| BIND--a data specification for storing and describing biomolecular interactions, molecular complexes and pathways. Bader et al (2000). <i>Bioinformatics</i> |        |
| Predicted with 2,625 interactions from I2D                                                                                                                   |        |
| <b>Stuart-Kim-2003</b>                                                                                                                                       | 0.38%  |
| A gene-coexpression network for global discovery of conserved genetic modules. Stuart et al (2003). <i>Science</i>                                           |        |
| Predicted with 24,872 interactions from supplementary material                                                                                               |        |
| <b>I2D-INNATEDDB-Mouse2Human</b>                                                                                                                             | 0.32%  |
| InnateDB: facilitating systems-level analyses of the mammalian innate immune response. Lynn et al (2008). <i>Mol Syst Biol</i>                               |        |
| Predicted with 1,451 interactions from I2D                                                                                                                   |        |

|                                                                                                                                                                                                             |       |
|-------------------------------------------------------------------------------------------------------------------------------------------------------------------------------------------------------------|-------|
| <b>Predicted</b>                                                                                                                                                                                            | 3.83% |
| <b>I2D-IntAct-Fly2Human</b>                                                                                                                                                                                 | 0.16% |
| The IntAct molecular interaction database in 2010. Aranda et al (2010). <i>Nucleic Acids Res</i><br>Predicted with 3,912 interactions from I2D                                                              |       |
| <b>Wu-Stein-2010</b>                                                                                                                                                                                        | 0.12% |
| A human functional protein interaction network and its application to cancer data analysis. Wu et al (2010). <i>Genome Biol</i><br>Predicted with 87,829 interactions from supplementary material           |       |
| <b>Co-localization</b>                                                                                                                                                                                      | 1.33% |
| <b>Johnson-Shoemaker-2003</b>                                                                                                                                                                               | 1.14% |
| Genome-wide survey of human alternative pre-mRNA splicing with exon junction microarrays. Johnson et al (2003). <i>Science</i><br>Co-localization with 426,332 interactions from GEO                        |       |
| <b>Schadt-Shoemaker-2004</b>                                                                                                                                                                                | 0.19% |
| A comprehensive transcript index of the human genome generated using microarrays and computational approaches. Schadt et al (2004). <i>Genome Biol</i><br>Co-localization with 60,126 interactions from GEO |       |
| <b>Pathway</b>                                                                                                                                                                                              | 0.49% |
| <b>NCI_NATURE</b>                                                                                                                                                                                           | 0.49% |
| Pathway with 10,122 interactions from Pathway Commons                                                                                                                                                       |       |
| <b>Shared protein domains</b>                                                                                                                                                                               | 0.19% |
| <b>INTERPRO</b>                                                                                                                                                                                             | 0.19% |
| Shared protein domains with 608,863 interactions from InterPro                                                                                                                                              |       |
